# Supplementary material
Source: Springer Nature journal article supplement (https://www.springermedizin.de/resource/supplementary/13058_2009_2413_MOESM5_ESM.pdf/9701360)
Supplement: MOESM5 [file 9701360]

A

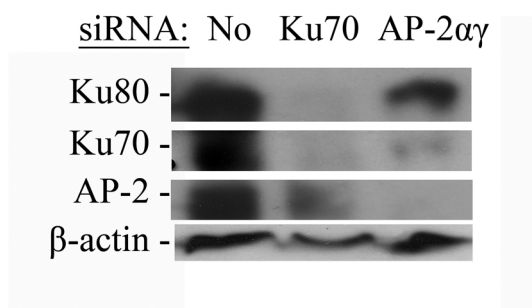

B

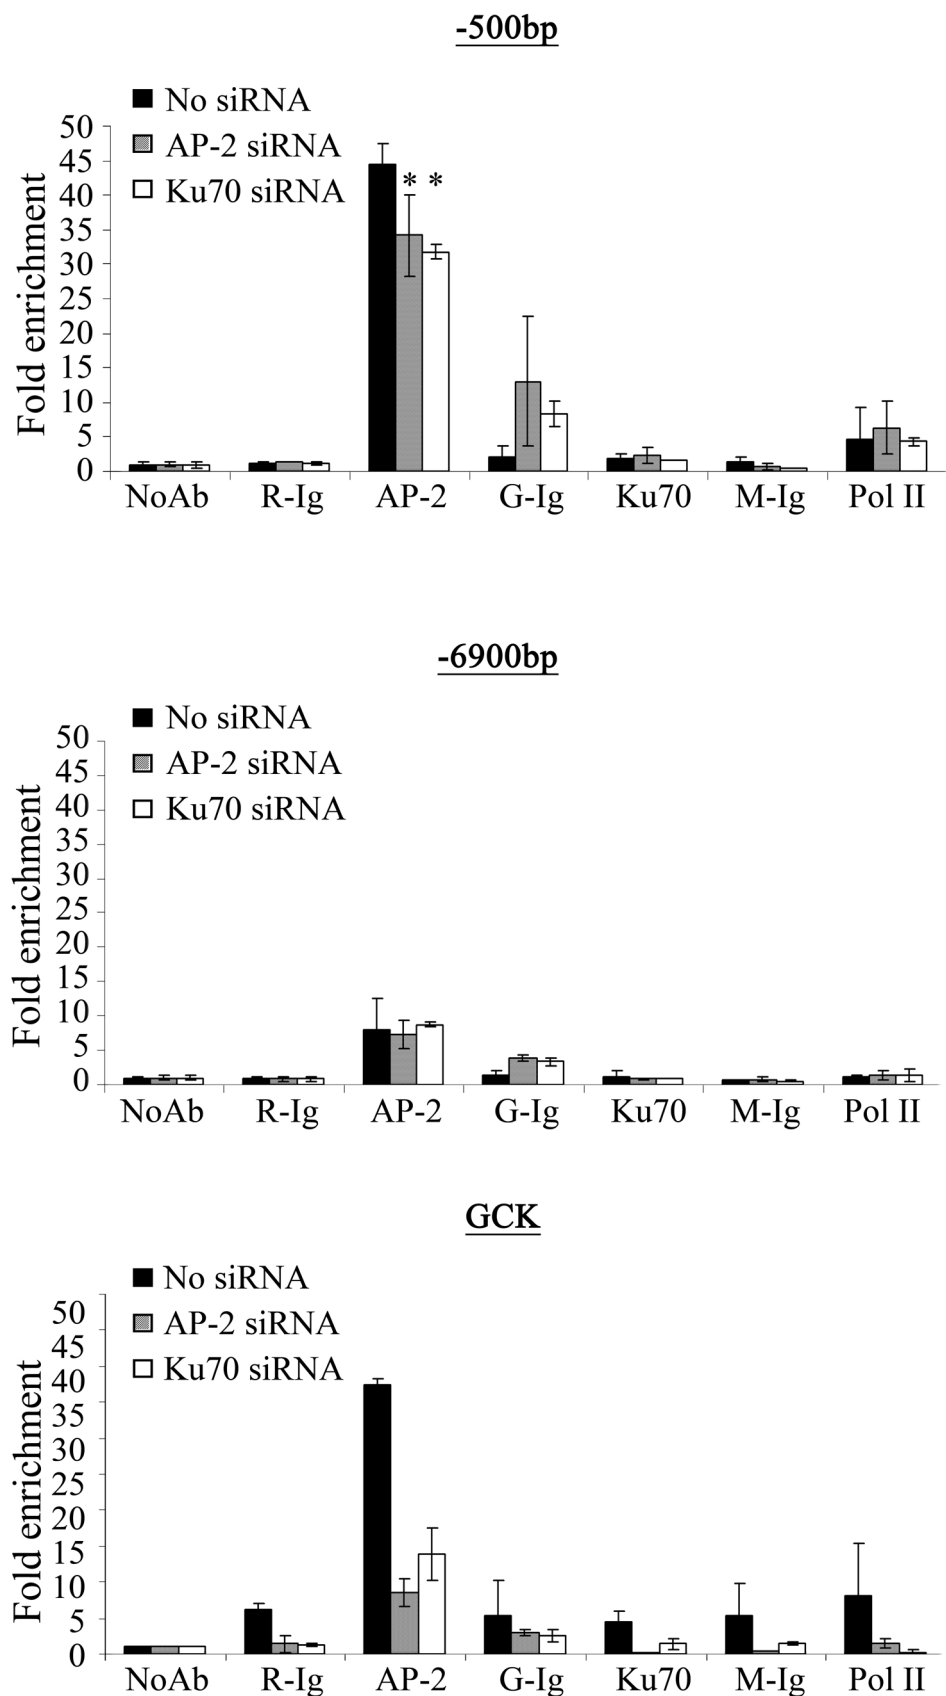

**Additional data 5. Ku proteins are necessary for the recruitment of AP-2 on the proximal ERBB2 gene promoter in SKBR3 cell line.**

**A.** Chromatin was extracted from SKBR3 cells transfected or not with AP-2 ( $\alpha\gamma$ ) or Ku70 siRNAs (above). Protein expression was verified by immunoblot. **B.** DNA amplified after chromatin immunoprecipitation with AP-2, Ku70 and RNA Polymerase II (Pol II) specific antibodies. ChIP with control antibodies (Ig) are presented on the left of each experimental point (R: rabbit, G: goat and M: mouse). Graphs show the fold enrichment of the target sequence, compared to the no-antibody (NoAb) condition. GCK sequence corresponds to a positive control for Ku recruitment. \*: p-values <0,05% compared to the No siRNA condition.
